# Supplementary material
Source: PubMed Central journal article supplement (PMC7867619)
Supplement: NIHMS1645489-supplement-Supplementary___Appendix__online_only_material__etc__.pdf [file NIHMS1645489-supplement-Supplementary___Appendix__online_only_material__etc__.pdf]

## Supplementary Materials

### Manual Curation of Genetic Variants at Clinical Sites

Each variant of interest undergoes manual curation at the gene and variant level, although specific processes vary by UDN clinical site. The function of the gene and associated role in human disease, if any, are examined using web sources such as OMIM (<https://omim.org/>), PubMed (<https://www.ncbi.nlm.nih.gov/pubmed/>), GeneCards (<https://www.genecards.org/>), and UniProt (<https://www.uniprot.org/>). The variant of interest is queried in human disease databases such as ClinVar (<https://www.ncbi.nlm.nih.gov/clinvar/>), HGMD (<http://www.hgmd.cf.ac.uk/>), OMIM (<https://omim.org/>), Geno2MP (<https://geno2mp.gs.washington.edu/>), and DECIPHER (<https://decipher.sanger.ac.uk/>), and reported associations with disease are investigated to the extent possible. Control databases such as gnomAD (<https://gnomad.broadinstitute.org/>) and DGV (<http://dgv.tcag.ca/dgv>) are queried, as well as bioinformatic tools to assess conservation and predicted pathogenicity, depending on the type of variant, such as RVIS (<http://genic-intolerance.org/>), CADD (<https://cadd.gs.washington.edu/>), Polyphen-2 (<http://genetics.bwh.harvard.edu/pph2/>), and many others. Further steps include the consideration of alternative transcripts (<https://www.ncbi.nlm.nih.gov/refseq/>) and differential expression patterns for genes of interest (<https://gtexportal.org/>). The MARRVEL tool (<http://marrvel.org/>) is a publicly available resource created by the UDN which allows users to efficiently search multiple databases simultaneously especially for model organisms (other similar tools used include Franklin (<https://franklin.genoox.com/>) and Varsome (<https://varsome.com/>)), and all of this information is synthesized by the UDN clinical sites independent of the sequencing core laboratory's interpretation to determine whether the variant is diagnostically relevant.

**Figure S1. Types of diagnoses achieved in prior non-diagnostic ES and ES-naïve settings are similar, indicating that an in-depth N-of-1 approach is crucial to resolving diagnoses in all UDN participants. Note that 15 of 90 diagnoses made after prior nondiagnostic ES were with non-NGS approaches, emphasizing the careful formulation of differential diagnoses with complementation/supplementation of the phenotype and then customizing the next steps.**

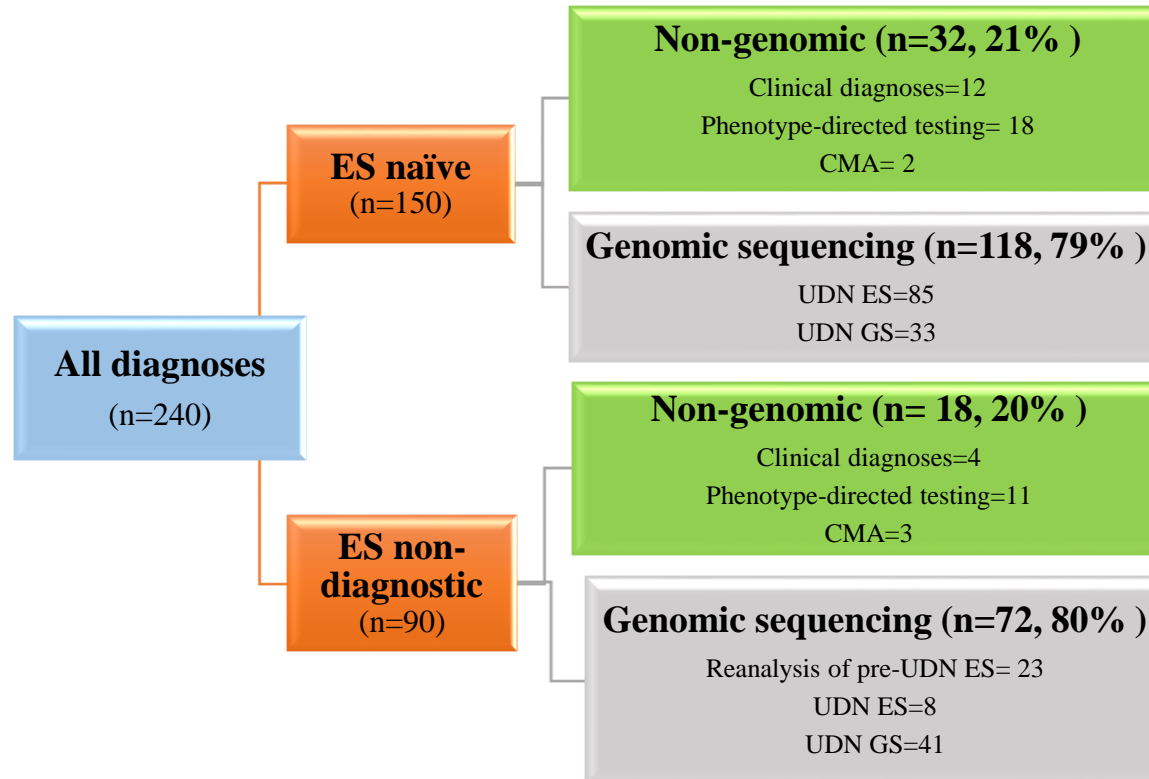

**Figure S2. Travel distances to UDN sites compared to the clinical genetics practices at the same medical centers, demonstrating the greater catchment area served by the UDN clinical sites.**

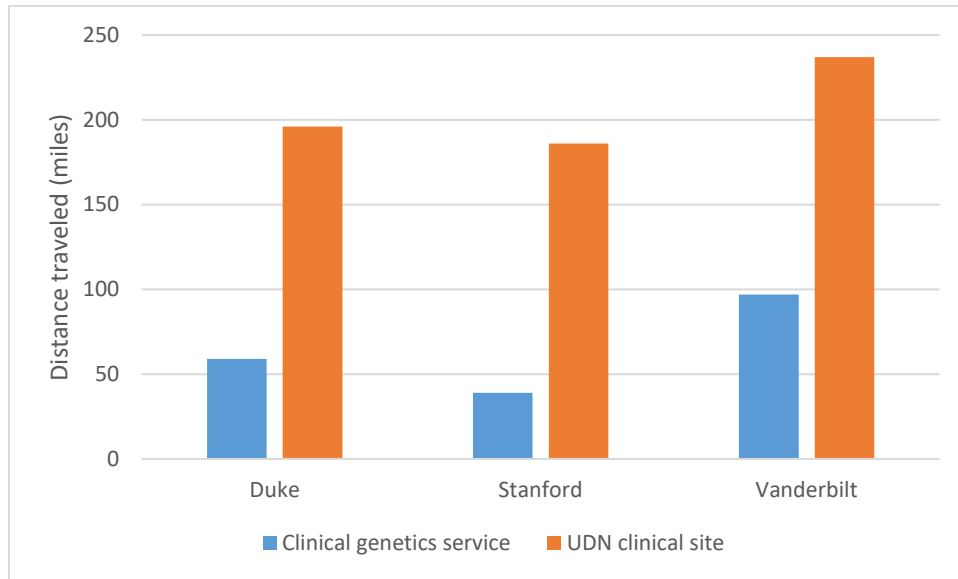

**Table S1. Details of the 240 diagnoses made by the four clinical sites.**

| <b>Diagnosis</b>                                  | <b>Participant age at evaluation (years)</b> | <b>Gene</b> | <b>Gene OMIM #</b> | <b>Was a Pre-UDN ES performed?</b> | <b>Were additional UDN-specific investigation (beyond ES/GS) required in order to achieve diagnosis?</b> |
|---------------------------------------------------|----------------------------------------------|-------------|--------------------|------------------------------------|----------------------------------------------------------------------------------------------------------|
| <b>Clinical diagnosis</b>                         |                                              |             |                    |                                    |                                                                                                          |
| Orofaciodigital syndrome, type unknown            | 6                                            | n/a         | n/a                | Yes                                | Complementation/ supplementation of prior clinical data                                                  |
| Lewy body dementia, Parkinson disease             | 69                                           | n/a         | n/a                | No                                 | Complementation/ supplementation of prior clinical data                                                  |
| You-Hoover-Fong syndrome                          | 3                                            | n/a         | n/a                | Yes                                | Complementation/ supplementation of prior clinical data                                                  |
| Recurrent autoimmune thrombocytopenic purpura     | 18                                           | n/a         | n/a                | No                                 | Complementation/ supplementation of prior clinical data                                                  |
| Primary progressive multiple sclerosis            | 62                                           | n/a         | n/a                | No                                 | Complementation/ supplementation of prior clinical data                                                  |
| Adiposis dolorosa                                 | 31                                           | n/a         | n/a                | No                                 | Complementation/ supplementation of prior clinical data                                                  |
| Necrotizing myopathy due to anti-HMGCR antibodies | 47                                           | n/a         | n/a                | Yes                                | Complementation/ supplementation of prior clinical data                                                  |
| Multiple sclerosis                                | 33                                           | n/a         | n/a                | No                                 | Complementation/ supplementation of prior clinical data                                                  |
| Hughes-Stovin syndrome                            | 26                                           | n/a         | n/a                | No                                 | Complementation/ supplementation of prior clinical data                                                  |

|                                                    |    |             |        |     |                                                                                                                      |
|----------------------------------------------------|----|-------------|--------|-----|----------------------------------------------------------------------------------------------------------------------|
| Multiple pterygium syndrome, Escobar variant       | 10 | n/a         | n/a    | Yes | Complementation/ supplementation of prior clinical data                                                              |
| Plastic bronchitis                                 | 14 | n/a         | n/a    | No  | Complementation/ supplementation of prior clinical data                                                              |
| Ehlers-Danlos syndrome, hypermobility type         | 52 | n/a         | n/a    | No  | Complementation/ supplementation of prior clinical data                                                              |
| Brown-Vialletto-Van Laere syndrome 1               | 38 | n/a         | n/a    | No  | Complementation/ supplementation of prior clinical data                                                              |
| Nontuberculous mycobacterial infection             | 63 | n/a         | n/a    | No  | Complementation/ supplementation of prior clinical data                                                              |
| Multiple sclerosis                                 | 28 | n/a         | n/a    | No  | Complementation/ supplementation of prior clinical data                                                              |
| Schnitzler syndrome                                | 70 | n/a         | n/a    | No  | Complementation/ supplementation of prior clinical data, Collaborative investigations                                |
| <b>Directed clinical testing</b>                   |    |             |        |     |                                                                                                                      |
| IgG4-related condition                             | 49 | n/a         | n/a    | No  | Generation of new genomic data, complementation/supplementation of prior clinical data, collaborative investigations |
| Peroxisomal disorder, NOS                          | 6  | <i>PEX1</i> | 602136 | No  | Complementation/supplementation of prior clinical data                                                               |
| Autoimmune myopathy with HMGCR and MDA5 antibodies | 25 | n/a         | n/a    | No  | Complementation/ supplementation of prior clinical data                                                              |
| Congenital prion disease                           | 39 | <i>PRNP</i> | 176640 | No  | Generation of new genomic data, Complementation/ supplementation of                                                  |

|                                                                                                              |    |                 |        |     |                                                         |
|--------------------------------------------------------------------------------------------------------------|----|-----------------|--------|-----|---------------------------------------------------------|
|                                                                                                              |    |                 |        |     | prior clinical data                                     |
| Alpha-1-antitrypsin deficiency                                                                               | 36 | <i>SERPINA1</i> | 107400 | Yes | Complementation/ supplementation of prior clinical data |
| Systemic lupus erythematosus                                                                                 | 18 | n/a             | n/a    | No  | Complementation/ supplementation of prior clinical data |
| Multiple sclerosis                                                                                           | 53 | n/a             | n/a    | No  | Complementation/ supplementation of prior clinical data |
| Sjogren syndrome                                                                                             | 58 | n/a             | n/a    | No  | Complementation/ supplementation of prior clinical data |
| Megalencephalic leukoencephalopathy with subcortical cysts 2B, remitting, with or without mental retardation | 6  | <i>HEPACAM</i>  | 611642 | Yes | Complementation/ supplementation of prior clinical data |
| Mitochondrial disease                                                                                        | 7  | n/a             | n/a    | Yes | Complementation/ supplementation of prior clinical data |
| Sjogren syndrome                                                                                             | 28 | n/a             | n/a    | Yes | Complementation/ supplementation of prior clinical data |
| Mitochondrial disorder of unknown etiology                                                                   | 4  | n/a             | n/a    | Yes | Complementation/ supplementation of prior clinical data |
| <b>Single gene testing</b>                                                                                   |    |                 |        |     |                                                         |
| Pseudohypoparathyroidism 1B                                                                                  | 46 | <i>GNAS</i>     | 139320 | No  | Generation of new genomic data                          |
| Huntington disease                                                                                           | 7  | <i>HTT</i>      | 613004 | Yes | Generation of new genomic data                          |
| Dystrophic epidermolysis bullosa                                                                             | 3  | <i>COL7A1</i>   | 120120 | No  | Generation of new genomic data                          |
| Infantile-onset                                                                                              | 11 | <i>SPTBN2</i>   | 604985 | No  | Generation of new genomic data,                         |

|                                                                    |    |                |        |     |                                                                                                                      |
|--------------------------------------------------------------------|----|----------------|--------|-----|----------------------------------------------------------------------------------------------------------------------|
| spinocerebellar ataxia 5                                           |    |                |        |     | collaborative investigations                                                                                         |
| Temple syndrome                                                    | 9  | n/a            | n/a    | No  | Generation of new genomic data, complementation/supplementation of prior clinical data                               |
| Hyaline fibromatosis syndrome                                      | 2  | ANTXR2         | 608041 | Yes | Generation of new genomic data, complementation/supplementation of prior clinical data                               |
| Infantile neuroaxonal dystrophy 1                                  | 3  | <i>PLA2G6</i>  | 603604 | Yes | Generation of new genomic data, complementation/supplementation of prior clinical data, collaborative investigations |
| Action myoclonus-renal failure syndrome                            | 31 | <i>SCARB2</i>  | 602257 | No  | Generation of new genomic data, Complementation/supplementation of prior clinical data                               |
| Frontotemporal dementia and/or amyotrophic lateral sclerosis 1     | 44 | <i>C9orf72</i> | 614260 | Yes | Generation of new genomic data                                                                                       |
| Pseudohypoparathyroidism                                           | 7  | <i>GNAS</i>    | 139320 | No  | Generation of new genomic data                                                                                       |
| Epileptic encephalopathy, early infantile, 38                      | 16 | <i>ARVI</i>    | 611647 | Yes | Generation of new genomic data, complementation/supplementation of prior clinical data, collaborative investigations |
| Glomerulocystic kidney disease with hyperuricemia and isosthenuria | 58 | <i>UMOD</i>    | 191845 | No  | Generation of new genomic data                                                                                       |
| Poretti-Boltshauser syndrome                                       | 22 | <i>LAMA1</i>   | 150320 | No  | Complementation/supplementation of prior clinical data                                                               |

|                                                                               |    |                          |        |     |                                                                                        |
|-------------------------------------------------------------------------------|----|--------------------------|--------|-----|----------------------------------------------------------------------------------------|
| Mosaic <i>GNAQ</i> -related disorder: phakomatosis pigmentovascularis         | 12 | <i>GNAQ</i>              | 600998 | No  | Generation of new genomic data                                                         |
| Rett syndrome                                                                 | 5  | <i>MECP2</i>             | 300005 | No  | Generation of new genomic data, complementation/supplementation of prior clinical data |
| Shwachman-Diamond syndrome 2                                                  | 17 | <i>EFL1</i>              | 617538 | No  | Generation of new genomic data, complementation/supplementation of prior clinical data |
| Hypercoagulable state secondary to prothrombin mutation                       | 48 | <i>F2</i>                | 176930 | Yes | Complementation/supplementation of prior clinical data                                 |
| <b>Chromosomal Microarray</b>                                                 |    |                          |        |     |                                                                                        |
| Chromosome 16p11.2 deletion                                                   | 27 | n/a                      | n/a    | Yes | Generation of new genomic data                                                         |
| Chromosome 1p13.3 deletion                                                    | 40 | n/a                      | n/a    | Yes | Generation of new genomic data                                                         |
| Wieacker-Wolff syndrome                                                       | 10 | <i>ZC4H2</i>             | 300897 | Yes | Generation of new genomic data                                                         |
| Developmental delay, intellectual disability, obesity and dysmorphism (DIDOD) | 19 | <i>PHIP</i>              | 612870 | No  | Generation of new genomic data                                                         |
| Chromosome 1q21.1 duplication                                                 | 28 | n/a                      | n/a    | No  | Generation of new genomic data                                                         |
| <b>Reanalysis of prior data</b>                                               |    |                          |        |     |                                                                                        |
| Neurodegeneration, childhood-onset, with cerebellar atrophy                   | 1  | <i>AGTPBP1</i>           | 606830 | Yes | Generation of new genomic data, collaborative investigations                           |
| Neurodevelopmental disorder with cataracts,                                   | 5  | Novel gene (unpublished) | n/a    | Yes | Generation of new genomic data, collaborative investigations                           |



|                                                                                                   |    |                 |        |     |                                                                                                                      |
|---------------------------------------------------------------------------------------------------|----|-----------------|--------|-----|----------------------------------------------------------------------------------------------------------------------|
| hearing loss, microcephaly and dysmorphic features                                                |    |                 |        |     |                                                                                                                      |
| Nephronophthisis 1                                                                                | 13 | <i>NPHP1</i>    | 607100 | Yes | Generation of new genomic data                                                                                       |
| <i>MAPK8IP3</i> -related neurodevelopmental disorder with or without variable brain abnormalities | 4  | <i>MAPK8IP3</i> | 605431 | Yes | Generation of new genomic data                                                                                       |
| Mitochondrial disorder                                                                            | 7  | <i>ATP5F1D</i>  | 603150 | Yes | Generation of new genomic data, complementation/supplementation of prior clinical data, collaborative investigations |
| <i>EIF2AK2</i> -related condition                                                                 | 12 | <i>EIF2AK2</i>  | 176871 | Yes | Generation of new genomic data, collaborative investigations                                                         |
| mTOR-related disorder                                                                             | 3  | <i>MTOR</i>     | 601231 | Yes | Generation of new genomic data, complementation/supplementation of prior clinical data                               |
| <i>CACNA1A</i> -related condition                                                                 | 18 | <i>CACNA1A</i>  | 601011 | Yes | Generation of new genomic data, complementation/supplementation of prior clinical data                               |
| Baraitser-Winter syndrome                                                                         | 15 | <i>ACTG1</i>    | 102560 | Yes | Complementation/supplementation of prior clinical data, collaborative investigations                                 |
| Hypotonia, ataxia, and delayed development syndrome                                               | 7  | <i>EBF3</i>     | 607407 | Yes | Generation of new genomic data, complementation/supplementation of prior clinical data, collaborative investigations |
| <i>ZNF526</i> -related condition                                                                  | 2  | <i>ZNF526</i>   | 614387 | Yes | Generation of new genomic data, collaborative investigations                                                         |

|                                                                                                           |    |                |        |     |                                                                                                                      |
|-----------------------------------------------------------------------------------------------------------|----|----------------|--------|-----|----------------------------------------------------------------------------------------------------------------------|
| <i>HUWE1</i> -related intellectual disability                                                             | 15 | <i>HUWE1</i>   | 300697 | Yes | Generation of new genomic data                                                                                       |
| GP130-deficient hyper-IgE syndrome                                                                        | 8  | <i>IL6ST</i>   | 600694 | Yes | Generation of new genomic data, complementation/supplementation of prior clinical data, collaborative investigations |
| Neurodevelopmental disorder with epilepsy, cataracts, feeding difficulties, and delayed brain myelination | 2  | <i>NACCI</i>   | 610672 | Yes | Generation of new genomic data, collaborative investigations                                                         |
| Cohen-Gibson syndrome                                                                                     | 9  | <i>EED</i>     | 605984 | Yes | Generation of new genomic data                                                                                       |
| Galloway-Mowat syndrome                                                                                   | 14 | <i>WDR73</i>   | 616144 | Yes | Generation of new genomic data, complementation/supplementation of prior clinical data                               |
| <i>CACNA1C</i> -related condition                                                                         | 7  | <i>CACNA1C</i> | 114205 | Yes | Generation of new genomic data, complementation/supplementation of prior clinical data                               |
| Glycogen storage disease XV: Polyglucosan Body Myopathy                                                   | 66 | <i>GYG1</i>    | 603942 | Yes | Generation of new genomic data, complementation/supplementation of prior clinical data, collaborative investigations |
| Shwachman-Diamond syndrome 2                                                                              | 14 | <i>EFL1</i>    | 617538 | Yes | Generation of new genomic data, complementation/supplementation of prior clinical data, collaborative investigations |
| Neurodevelopmental disorder with hypotonia, seizures, and absent language                                 | 6  | <i>HECW2</i>   | 617245 | Yes | Complementation/supplementation of prior clinical data, collaborative investigations                                 |

|                                                                                                         |    |                 |        |     |                                                                                                                      |
|---------------------------------------------------------------------------------------------------------|----|-----------------|--------|-----|----------------------------------------------------------------------------------------------------------------------|
| Neurodevelopmental disorder with regression, abnormal movements, loss of speech, and seizures (NEDAMSS) | 5  | <i>IRF2BPL</i>  | 611720 | Yes | Generation of new genomic data, Complementation/supplementation of prior clinical data, collaborative investigations |
| <i>MYBPC1</i> -related disorder                                                                         | 1  | <i>MYBPC1</i>   | 160794 | Yes | Generation of new genomic data, complementation/supplementation of prior clinical data, collaborative investigations |
| <i>IRF2BPL</i> -related condition                                                                       | 2  | IRF2BPL         | 611720 | Yes | Generation of new genomic data, complementation/supplementation of prior clinical data, collaborative investigations |
| <b>UDN Exome sequencing</b>                                                                             |    |                 |        |     |                                                                                                                      |
| Pontocerebellar hypoplasia, type 6                                                                      | 12 | <i>RARS2</i>    | 611524 | No  | None                                                                                                                 |
| Hypotonia, infantile, with psychomotor retardation and characteristic facies 3                          | 1  | <i>TBCK</i>     | 616899 | No  | None                                                                                                                 |
| Spinocerebellar ataxia 28 (SCA28)                                                                       | 66 | <i>AFG3L2</i>   | 604581 | No  | None                                                                                                                 |
| Ehlers-Danlos syndrome, classic type, 2                                                                 | 34 | <i>COL5A2</i>   | 120190 | No  | Generation of new genomic data                                                                                       |
| Basal ganglia calcification, idiopathic, 1                                                              | 58 | <i>SLC20A2</i>  | 158378 | No  | None                                                                                                                 |
| Spastic paraplegia 9A, autosomal dominant                                                               | 35 | <i>ALDH18A1</i> | 138250 | No  | None                                                                                                                 |
| Severe progeria (atypical)                                                                              | 4  | <i>ZMPSTE24</i> | 606480 | No  | None                                                                                                                 |
| Coffin-Siris syndrome 1                                                                                 | 5  | <i>ARID1B</i>   | 614556 | No  | None                                                                                                                 |
| Farber lipogranulomatosis                                                                               | 43 | <i>ASAHI</i>    | 613468 | No  | Collaborative investigations                                                                                         |

|                                                                                         |    |                 |        |     |                                                                                        |
|-----------------------------------------------------------------------------------------|----|-----------------|--------|-----|----------------------------------------------------------------------------------------|
| Aicardi-Goutieres syndrome                                                              | 28 | <i>RNASEH2A</i> | 606034 | No  | Complementation/supplementation of prior clinical data                                 |
| Congenital disorder of glycosylation, type IIj                                          | 3  | <i>COG4</i>     | 606976 | No  | Generation of new genomic data, collaborative investigations                           |
| <i>TRIM8</i> -related epileptic encephalopathy                                          | 11 | <i>TRIM8</i>    | 606125 | No  | None                                                                                   |
| <i>UBAP1</i> related spastic paraplegia                                                 | 12 | <i>UBAP1</i>    | 609787 | No  | Collaborative investigations                                                           |
| Cardiofaciocutaneous syndrome                                                           | 18 | <i>BRAF</i>     | 164757 | No  | None                                                                                   |
| Mitochondrial DNA depletion syndrome, NOS                                               | 62 | <i>POLG</i>     | 174763 | No  | None                                                                                   |
| Mental retardation, autosomal dominant 31                                               | 9  | <i>PURA</i>     | 600473 | No  | Generation of new genomic data, Complementation/supplementation of prior clinical data |
| Stankiewicz-Isidor syndrome                                                             | 12 | <i>PSMD12</i>   | 604450 | No  | None                                                                                   |
| Intellectual developmental disorder with dysmorphic facies and behavioral abnormalities | 4  | <i>FBXO11</i>   | 607871 | Yes | None                                                                                   |
| Kohlschutter-Tonz syndrome                                                              | 19 | <i>ROGDI</i>    | 614574 | No  | None                                                                                   |
| Epilepsy-aphasia syndrome                                                               | 13 | <i>GRIN2A</i>   | 138253 | No  | None                                                                                   |
| <i>DYRK1A</i> -related intellectual disability syndrome                                 | 3  | <i>DYRK1A</i>   | 600855 | No  | None                                                                                   |
| Peroxisome biogenesis disorder 14B                                                      | 38 | <i>PEX11B</i>   | 603867 | No  | None                                                                                   |
| Osteopathia striata with cranial sclerosis                                              | 10 | <i>AMER1</i>    | 300647 | No  | None                                                                                   |

|                                                                                            |    |                 |        |     |                                                                                                                      |
|--------------------------------------------------------------------------------------------|----|-----------------|--------|-----|----------------------------------------------------------------------------------------------------------------------|
| Mental retardation, X-linked, with cerebellar hypoplasia and distinctive facial appearance | 13 | <i>OPHN1</i>    | 300127 | No  | Generation of new genomic data                                                                                       |
| Bainbridge-Ropers syndrome                                                                 | 16 | <i>ASXL3</i>    | 615115 | No  | None                                                                                                                 |
| Marfan syndrome                                                                            | 18 | <i>FBN1</i>     | 134797 | No  | None                                                                                                                 |
| Basal ganglia calcification, idiopathic, 1                                                 | 58 | <i>SLC20A2</i>  | 158378 | No  | None                                                                                                                 |
| Stickler syndrome, type 1                                                                  | 15 | <i>COL2A1</i>   | 120140 | No  | None                                                                                                                 |
| Roifman syndrome                                                                           | 4  | <i>RNU4ATAC</i> | 601428 | Yes | None                                                                                                                 |
| <i>ZNF292</i> -related Neurodevelopmental disorder                                         | 4  | <i>ZNF292</i>   | 616213 | Yes | Collaborative investigations                                                                                         |
| <i>DSP</i> -related arrhythmogenic cardiomyopathy                                          | 33 | <i>DSP</i>      | 125647 | No  | None                                                                                                                 |
| Epileptic encephalopathy, early infantile, 33 ( <i>EIEE33</i> )                            | 11 | <i>EEF1A2</i>   | 602959 | No  | None                                                                                                                 |
| Deafness, autosomal recessive 2 ( <i>DFNB2</i> )                                           | 13 | <i>MYO7A</i>    | 276903 | Yes | None                                                                                                                 |
| Bohring-Opitz syndrome                                                                     | 3  | <i>ASXL1</i>    | 612990 | No  | None                                                                                                                 |
| Mitochondrial encephalomyopathy                                                            | 26 | <i>SLC25A42</i> | 610823 | No  | Generation of new genomic data, complementation/supplementation of prior clinical data, collaborative investigations |
| Mental retardation, autosomal dominant, 26                                                 | 14 | <i>AUTS2</i>    | 607270 | No  | Collaborative investigations                                                                                         |
| Progressive Myoclonic Epilepsy                                                             | 29 | <i>KCNC1</i>    | 176258 | No  | None                                                                                                                 |

|                                                                                                                          |    |               |        |    |                                                              |
|--------------------------------------------------------------------------------------------------------------------------|----|---------------|--------|----|--------------------------------------------------------------|
| Polycystic Kidney Disease                                                                                                | 64 | <i>PKD1</i>   | 601313 | No | None                                                         |
| CAPOS syndrome / Fever-induced paroxysmal weakness and encephalopathy (FIPWE)                                            | 8  | <i>ATP1A3</i> | 182350 | No | None                                                         |
| Mucopolysaccharidosis type IIIB (Sanfilippo B Syndrome)                                                                  | 19 | <i>NAGLU</i>  | 609701 | No | None                                                         |
| Metabolic encephalomyopathic crises, recurrent, with rhabdomyolysis, cardiac arrhythmias, and neurodegeneration (MECRCN) | 4  | <i>TANGO2</i> | 616830 | No | None                                                         |
| Helsmoortel-Van der Aa Syndrome                                                                                          | 5  | <i>ADNP</i>   | 611386 | No | None                                                         |
| <i>USP7</i> -Related Condition                                                                                           | 8  | <i>USP7</i>   | 602519 | No | Collaborative investigations                                 |
| <i>KMT2C</i> -related disorder                                                                                           | 18 | <i>KMT2C</i>  | 606833 | No | None                                                         |
| <i>CHRNA3</i> -related disease                                                                                           | 66 | <i>CHRNA3</i> | 118503 | No | Complementation/supplementation of prior clinical data       |
| Spastic paraplegia 35                                                                                                    | 8  | <i>FA2H</i>   | 611026 | No | None                                                         |
| Mental retardation, autosomal dominant 26 (MRD26)                                                                        | 10 | <i>AUTS2</i>  | 607270 | No | None                                                         |
| Autoinflammatory syndrome                                                                                                | 72 | <i>NLRP12</i> | 609648 | No | Complementation/supplementation of prior clinical data       |
| Retinitis pigmentosa 71                                                                                                  | 10 | <i>IFT172</i> | 607386 | No | Generation of new genomic data, collaborative investigations |
| Kleefstra syndrome                                                                                                       | 33 | <i>EHMT1</i>  | 607001 | No | Complementation/supplementation of                           |

|                                                                                         |    |                |        |     |                                                                                         |
|-----------------------------------------------------------------------------------------|----|----------------|--------|-----|-----------------------------------------------------------------------------------------|
|                                                                                         |    |                |        |     | prior clinical data                                                                     |
| Basal cell nevus syndrome                                                               | 12 | <i>PTCH1</i>   | 601309 | No  | Generation of new genomic data, complementation/supplementation of prior clinical data  |
| Noonan syndrome                                                                         | 36 | <i>PTPN11</i>  | 176876 | No  | None                                                                                    |
| Epileptic encephalopathy, early infantile, 47 (EIEE47)                                  | 7  | <i>FGF12</i>   | 601513 | No  | None                                                                                    |
| Pitt-Hopkins syndrome                                                                   | 10 | <i>TCF4</i>    | 602272 | No  | None                                                                                    |
| <i>FOXG1</i> syndrome                                                                   | 5  | <i>FOXG1</i>   | 164874 | No  | None                                                                                    |
| Marfan syndrome                                                                         | 4  | <i>FBN1</i>    | 134797 | No  | None                                                                                    |
| Trichorhinophalangeal syndrome                                                          | 4  | <i>TRPS1</i>   | 604386 | No  | None                                                                                    |
| Mental retardation, autosomal dominant 18                                               | 4  | <i>GATAD2B</i> | 614998 | Yes | Generation of new genomic data, collaborative investigations                            |
| Hypotonia, infantile, with psychomotor retardation and characteristic facies 3 (IHPRF3) | 3  | <i>TBCK</i>    | 616899 | Yes | None                                                                                    |
| Aortic valve disease                                                                    | 28 | <i>NOTCH1</i>  | 190198 | No  | Generation of new genomic data, complementation/ supplementation of prior clinical data |
| Scoliosis                                                                               | 28 | <i>POC5</i>    | 617880 | No  | Complementation/supplementation of prior clinical data                                  |
| Autism                                                                                  | 28 | <i>MSL2</i>    | 614802 | No  | Complementation/supplementation of prior clinical data                                  |
| Poretti-Boltshauser syndrome                                                            | 6  | <i>LAMA1</i>   | 150320 | No  | None                                                                                    |

|                                                                                       |    |                |        |    |                                                                                                                      |
|---------------------------------------------------------------------------------------|----|----------------|--------|----|----------------------------------------------------------------------------------------------------------------------|
| Epileptic encephalopathy, early infantile, 36                                         | 2  | <i>ALG13</i>   | 300776 | No | None                                                                                                                 |
| Idiopathic basal ganglia calcification (Fahr disease)                                 | 17 | <i>SLC20A2</i> | 158378 | No | None                                                                                                                 |
| SanFilippo Syndrome                                                                   | 41 | <i>HGSNAT</i>  | 610453 | No | None                                                                                                                 |
| Familial cold-induced autoinflammatory syndrome                                       | 31 | <i>NLRP3</i>   | 606416 | No | Complementation/supplementation of prior clinical data                                                               |
| Short stature, onychodysplasia, facial dysmorphism, and hypotrichosis (SOFT syndrome) | 7  | <i>POCIA</i>   | 614783 | No | Collaborative investigations                                                                                         |
| Hypokalemic periodic paralysis                                                        | 7  | <i>SCN4A</i>   | 603967 | No | None                                                                                                                 |
| Proximal myopathy & ophthalmoplegia                                                   | 49 | <i>MYH2</i>    | 160740 | No | Generation of new genomic data, complementation/supplementation of prior clinical data, collaborative investigations |
| <i>TAX1BP3</i> -related arrhythmogenic right ventricular cardiomyopathy               | 15 | <i>TAX1BP3</i> | 616484 | No | Generation of new genomic data, collaborative investigations                                                         |
| Mental retardation, autosomal dominant 13 (MRD13)                                     | 8  | <i>DYNC1H1</i> | 600112 | No | None                                                                                                                 |
| Coffin-Siris Syndrome 8 (CSS8)                                                        | 11 | <i>SMARCC2</i> | 601734 | No | Collaborative investigations                                                                                         |
| Mandibulofacial dysostosis, Guion-almeida type                                        | 4  | <i>EFTUD2</i>  | 603892 | No | None                                                                                                                 |
| Neurodevelopmental disorder with or without anomalies of the brain,                   | 21 | <i>RERE</i>    | 605226 | No | None                                                                                                                 |



|                                                                          |    |                |        |     |                                                                                                                      |
|--------------------------------------------------------------------------|----|----------------|--------|-----|----------------------------------------------------------------------------------------------------------------------|
| eye, or heart                                                            |    |                |        |     |                                                                                                                      |
| GTP cyclohydrolase I deficiency                                          | 4  | <i>GCHI</i>    | 600225 | No  | None                                                                                                                 |
| Alagille syndrome                                                        | 32 | <i>JAG1</i>    | 601920 | No  | None                                                                                                                 |
| Stormorken syndrome                                                      | 6  | <i>STIM1</i>   | 605921 | No  | Generation of new genomic data, complementation/ supplementation of prior clinical data                              |
| <i>PIGQ</i> -related condition                                           | 2  | <i>PIGQ</i>    | 605754 | No  | Complementation/supplementation of prior clinical data, collaborative investigations                                 |
| <i>SCN2A</i> -related condition                                          | 15 | <i>SCN2A</i>   | 182390 | No  | None                                                                                                                 |
| Cardiofaciocutaneous syndrome 3                                          | 4  | <i>MAP2K1</i>  | 176872 | No  | None                                                                                                                 |
| Bethlem myopathy 1                                                       | 15 | <i>COL6A1</i>  | 120220 | No  | Complementation/supplementation of prior clinical data                                                               |
| <i>ATP1A3</i> -related disorder                                          | 7  | <i>ATP1A3</i>  | 182350 | No  | None                                                                                                                 |
| <i>TSPEAR</i> -related disorder of tooth and hair follicle morphogenesis | 7  | <i>TSPEAR</i>  | 612920 | No  | None                                                                                                                 |
| Shashi-Pena syndrome                                                     | 9  | <i>ASXL2</i>   | 612991 | Yes | Generation of new genomic data, complementation/supplementation of prior clinical data, collaborative investigations |
| <i>PIK3CA</i> -related overgrowth spectrum                               | 1  | <i>PIK3CA</i>  | 171834 | No  | None                                                                                                                 |
| <b>UDN Genome sequencing</b>                                             |    |                |        |     |                                                                                                                      |
| Idiopathic basal ganglia calcification (Fahr disease)                    | 61 | <i>SLC20A2</i> | 158378 | No  | None                                                                                                                 |

|                                                                                                         |    |                |        |     |                                                                                        |
|---------------------------------------------------------------------------------------------------------|----|----------------|--------|-----|----------------------------------------------------------------------------------------|
| Galactosialidosis                                                                                       | 16 | <i>CTSA</i>    | 613111 | No  | None                                                                                   |
| <i>KLF7</i> -related syndrome                                                                           | 7  | <i>KLF7</i>    | 604865 | No  | Complementation/supplementation of prior clinical data                                 |
| Kilquist syndrome                                                                                       | 5  | <i>SLC12A2</i> | 600840 | Yes | Complementation/supplementation of prior clinical data                                 |
| <i>UBA5</i> -related disorder(s): spinocerebellar ataxia & epileptic encephalopathy early infantile, 44 | 4  | <i>UBA5</i>    | 610552 | Yes | Complementation/supplementation of prior clinical data                                 |
| <i>ADNP</i> syndrome (Helsmoortel-van der Aa syndrome)                                                  | 8  | <i>ADNP</i>    | 611386 | Yes | None                                                                                   |
| Early infantile epileptic encephalopathy 4                                                              | 7  | <i>STXBPI</i>  | 602926 | No  | Generation of new genomic data                                                         |
| Mental retardation, autosomal dominant 6, with or without seizures (MRD6)                               | 16 | <i>GRIN2B</i>  | 138252 | Yes | None                                                                                   |
| Paroxysmal dyskinesia                                                                                   | 4  | <i>KCNMA1</i>  | 600150 | No  | None                                                                                   |
| Diploid/triploid mosaicism                                                                              | 3  | n/a            | n/a    | No  | Generation of new genomic data                                                         |
| Van Maldergem syndrome 2                                                                                | 3  | <i>FAT4</i>    | 612411 | No  | Generation of new genomic data, complementation/supplementation of prior clinical data |
| Coffin-Lowry syndrome                                                                                   | 2  | <i>RPS6KA3</i> | 300075 | No  | Complementation/supplementation of prior clinical data                                 |
| Coffin-Siris syndrome 1                                                                                 | 2  | <i>ARID1B</i>  | 614556 | Yes | Generation of new genomic data, complementation/supplementation of prior clinical data |
| Senior-Loken syndrome 5                                                                                 | 32 | <i>IQCBI</i>   | 609237 | No  | None                                                                                   |

|                                                      |    |                 |        |     |                                                                                        |
|------------------------------------------------------|----|-----------------|--------|-----|----------------------------------------------------------------------------------------|
| Epileptic encephalopathy, early infantile, 64        | 2  | <i>RHOBTB2</i>  | 607352 | Yes | None                                                                                   |
| Rett syndrome, congenital variant                    | 18 | <i>FOXP1</i>    | 164874 | No  | None                                                                                   |
| Charcot-Marie-Tooth disease, axonal, 2s              | 11 | <i>IGHMBP2</i>  | 600502 | Yes | Generation of new genomic data, collaborative investigations                           |
| Kleefstra syndrome 2                                 | 6  | <i>KMT2C</i>    | 606833 | Yes | Generation of new genomic data, complementation/supplementation of prior clinical data |
| <i>COL4A1</i> -related disease                       | 55 | <i>COL4A1</i>   | 120130 | No  | None                                                                                   |
| Myopathy, distal, 5                                  | 33 | <i>ADSSL1</i>   | 612498 | Yes | None                                                                                   |
| Spastic paraplegia, 76                               | 41 | <i>CAPN1</i>    | 114220 | No  | Generation of new genomic data, complementation/supplementation of prior clinical data |
| Cornelia de Lange syndrome 5                         | 10 | <i>HDAC8</i>    | 300269 | Yes | Generation of new genomic data                                                         |
| <i>FAM177A1</i> -related disorder                    | 6  | <i>FAM177A1</i> | n/a    | Yes | Generation of new genomic data, collaborative investigations                           |
| <i>NR2F2</i> -associated congenital heart defects    | 11 | <i>NR2F2</i>    | 107773 | Yes | None                                                                                   |
| <i>POLR3</i> -related leukodystrophy                 | 5  | <i>POLR3A</i>   | 614258 | Yes | None                                                                                   |
| Leukoencephalopathy, brain calcifications, and cysts | 45 | <i>SNORD118</i> | 616663 | No  | Generation of new genomic data, complementation/supplementation of prior clinical data |
| Peroxisome biogenesis disorder                       | 11 | <i>PEX6</i>     | 601498 | Yes | None                                                                                   |
| Dermatitis, atopic, susceptibility to, 2             | 4  | <i>FLG</i>      | 135940 | Yes | None                                                                                   |
| Rett syndrome                                        | 3  | <i>MECP2</i>    | 300005 | No  | None                                                                                   |

|                                                                                |    |                 |        |     |                                                                                                                      |
|--------------------------------------------------------------------------------|----|-----------------|--------|-----|----------------------------------------------------------------------------------------------------------------------|
| Complex phenotype with hypopigmentation, developmental delay and organomegaly  | 2  | <i>CLCN7</i>    | 602727 | Yes | Generation of new genomic data, complementation/supplementation of prior clinical data, collaborative investigations |
| Telangiectasia, hereditary hemorrhagic, 1 (HHT1)                               | 18 | <i>ENG</i>      | 131195 | No  | Generation of new genomic data, complementation/supplementation of prior clinical data                               |
| Hypotonia, infantile, with psychomotor retardation and characteristic facies 3 | 4  | <i>TBCK</i>     | 616899 | No  | Generation of new genomic data                                                                                       |
| <i>SYNGAP1</i> -related Intellectual disability and epilepsy                   | 9  | <i>SYNGAP1</i>  | 603384 | Yes | None                                                                                                                 |
| Muscular dystrophy, limb-girdle, 2Y                                            | 16 | <i>TOR1AIP1</i> | 614512 | No  | Complementation/supplementation of prior clinical data                                                               |
| Spastic paraplegia, 7                                                          | 53 | <i>SPG7</i>     | 602783 | No  | None                                                                                                                 |
| Epileptic encephalopathy, early infantile, 2                                   | 3  | <i>CDKL5</i>    | 300203 | Yes | Generation of new genomic data                                                                                       |
| Microcephaly 17, primary, autosomal recessive (MCPH17)                         | 7  | <i>CIT</i>      | 605629 | Yes | Generation of new genomic data, complementation/supplementation of prior clinical data                               |
| <i>SCN8A</i> -related epilepsy with encephalopathy                             | 11 | <i>SCN8A</i>    | 600702 | No  | Generation of new genomic data, complementation/supplementation of prior clinical data, collaborative investigations |
| Developmental delay, intellectual disability, obesity, and dysmorphic features | 14 | <i>PHIP</i>     | 612870 | No  | None                                                                                                                 |
| Ataxia-telangiectasia-like disorder 1 (ATLD1)                                  | 31 | <i>MRE11</i>    | 600814 | Yes | Generation of new genomic data                                                                                       |

|                                                                                       |    |                |        |     |                                                                    |
|---------------------------------------------------------------------------------------|----|----------------|--------|-----|--------------------------------------------------------------------|
| Intellectual developmental disorder with or without epilepsy or cerebellar ataxia     | 7  | <i>RORA</i>    | 600825 | Yes | None                                                               |
| <i>PURA</i> Syndrome                                                                  | 4  | <i>PURA</i>    | 600473 | Yes | None                                                               |
| Joubert syndrome 30                                                                   | 7  | <i>ARMC9</i>   | 617612 | Yes | None                                                               |
| <i>NADK2</i> deficiency                                                               | 15 | <i>NADK2</i>   | 615787 | No  | None                                                               |
| <i>TBX2</i> -related disorder                                                         | 8  | <i>TBX2</i>    | 600747 | Yes | Collaborative investigations                                       |
| Paragangliomas 1                                                                      | 58 | <i>SDHD</i>    | 602690 | No  | Generation of new genomic data                                     |
| Titinopathy                                                                           | 10 | <i>TTN</i>     | 188840 | Yes | Complementation/supplementation of prior clinical data             |
| Epileptic encephalopathy, early infantile, 35                                         | 2  | <i>ITPA</i>    | 147520 | Yes | Generation of new genomic data                                     |
| Congenital disorder of glycosylation, Ik                                              | 4  | <i>ALG1</i>    | 605907 | Yes | Collaborative investigations                                       |
| Smith-Magenis syndrome                                                                | 25 | <i>RAI1</i>    | 607642 | No  | None                                                               |
| <i>KMT2B</i> -related dystonia                                                        | 18 | <i>KMT2B</i>   | 606834 | No  | Generation of new genomic data                                     |
| Epilepsy, hearing loss, and mental retardation syndrome                               | 10 | <i>SPATA5</i>  | 613940 | Yes | Generation of new genomic data                                     |
| Muscular dystrophy-dystroglycanopathy (limb-girdle), type C, 5 ( <i>MDDGC5</i> )      | 26 | <i>FKRP</i>    | 606596 | Yes | Generation of new genomic data, Collaborative investigations       |
| Muscular dystrophy rigid spine and myopathy, congenital with fiber type disproportion | 36 | <i>SELENON</i> | 606210 | No  | Complementation/supplementation of prior clinical data             |
| Progressive external ophthalmoplegia with                                             | 40 | <i>TOP3A</i>   | 601243 | No  | Generation of new genomic data, Complementation/supplementation of |

|                                                                                  |    |                |        |     |                                                                                                                      |
|----------------------------------------------------------------------------------|----|----------------|--------|-----|----------------------------------------------------------------------------------------------------------------------|
| mitochondrial DNA deletions                                                      |    |                |        |     | prior clinical data                                                                                                  |
| Cystinosis                                                                       | 18 | <i>CTNS</i>    | 606272 | No  | Generation of new genomic data                                                                                       |
| Rett syndrome                                                                    | 7  | <i>MECP2</i>   | 300005 | Yes | None                                                                                                                 |
| Dystonia, childhood-onset, with optic atrophy and basal ganglia abnormalities    | 5  | <i>MECR</i>    | 608205 | Yes | Generation of new genomic data, collaborative investigations                                                         |
| Charcot-Marie-Tooth disease, axonal, 2T                                          | 31 | <i>MME</i>     | 120520 | Yes | None                                                                                                                 |
| <i>HNRNPA1</i> -related multisystem proteinopathy                                | 32 | <i>HNRNPA1</i> | 164017 | Yes | Generation of new genomic data, collaborative investigations                                                         |
| Mental retardation, autosomal dominant 18                                        | 9  | <i>GATAD2B</i> | 614998 | Yes | None                                                                                                                 |
| Au-Kline Syndrome                                                                | 10 | <i>HNRNPK</i>  | 600712 | Yes | Generation of new genomic data, complementation/supplementation of prior clinical data, collaborative investigations |
| Retinal dystrophy and obesity                                                    | 49 | <i>TUB</i>     | 601197 | No  | None                                                                                                                 |
| <i>RNHI</i> -associated disorder                                                 | 22 | <i>RNHI</i>    | 173320 | Yes | Generation of new genomic data, complementation/supplementation of prior clinical data, collaborative investigations |
| Muscular dystrophy, limb-girdle, autosomal recessive 10                          | 15 | <i>TTN</i>     | 188840 | No  | Generation of new genomic data, complementation/supplementation of prior clinical data                               |
| <b>Diagnoses due to clinical site dual analysis of UDN Exome sequencing data</b> |    |                |        |     |                                                                                                                      |
| 3-Methylglutaconic aciduria type 8                                               | 11 | <i>HTRA2</i>   | 606441 | No  | Generation of new genomic data, complementation/supplementation of prior clinical data, collaborative                |

|                                                                               |    |                  |        |     |                                                                                                                      |
|-------------------------------------------------------------------------------|----|------------------|--------|-----|----------------------------------------------------------------------------------------------------------------------|
|                                                                               |    |                  |        |     | investigations                                                                                                       |
| Mental retardation, AD58                                                      | 24 | <i>SET</i>       | 600960 | No  | Generation of new genomic data                                                                                       |
| Fanconi anemia, complementation group R (FANCR)                               | 10 | <i>RAD51</i>     | 179617 | No  | Generation of new genomic data                                                                                       |
| <i>KIDINS220</i> -related condition                                           | 2  | <i>KIDINS220</i> | 615759 | No  | Generation of new genomic data, collaborative investigations                                                         |
| Spastic paraplegia 7                                                          | 31 | <i>SPG7</i>      | 602783 | No  | Generation of new genomic data                                                                                       |
| Progressive myoclonic epilepsy 3                                              | 12 | <i>KCTD7</i>     | 611725 | No  | Generation of new genomic data, collaborative investigations                                                         |
| <i>PUS7</i> -related syndrome                                                 | 5  | <i>PUS7</i>      | 616261 | Yes | Generation of new genomic data, complementation/supplementation of prior clinical data, collaborative investigations |
| <b>Diagnoses due to clinical site dual analysis of Genome sequencing data</b> |    |                  |        |     |                                                                                                                      |
| <i>KMT2B</i> -related dystonia                                                | 9  | <i>KMT2B</i>     | 606834 | Yes | Generation of new genomic data, complementation/supplementation of prior clinical data                               |
| <i>CACNA1A</i> -related disease                                               | 2  | <i>CACNA1A</i>   | 601011 | No  | Generation of new genomic data, complementation/supplementation of prior clinical data                               |
| <i>AIFM1</i> -related hypomyelination with spondylometaphyseal dysplasia      | 8  | <i>AIFM1</i>     | 300169 | Yes | Generation of new genomic data                                                                                       |
| <i>NBEA</i> -related developmental delay and                                  | 6  | <i>NBEA</i>      | 604889 | Yes | Generation of new genomic data, complementation/supplementation of                                                   |

|                                                                                  |    |                          |        |     |                                                                                                                      |
|----------------------------------------------------------------------------------|----|--------------------------|--------|-----|----------------------------------------------------------------------------------------------------------------------|
| generalized epilepsy                                                             |    |                          |        |     | prior clinical data, collaborative investigations                                                                    |
| Neurodevelopmental disorder with epilepsy, microcephaly, and dysmorphic features | 2  | Novel gene (unpublished) | n/a    | Yes | Generation of new genomic data, collaborative investigations                                                         |
| Early infantile epileptic encephalopathy, 58                                     | 22 | <i>NTRK2</i>             | 600456 | No  | Generation of new genomic data                                                                                       |
| <i>ADGRVI</i> -related myoclonic epilepsy                                        | 11 | <i>ADGRVI</i>            | 602851 | No  | Generation of new genomic data                                                                                       |
| Primary congenital glaucoma 3                                                    | 31 | <i>TEK</i>               | 600221 | No  | Generation of new genomic data, complementation/supplementation of prior clinical data                               |
| Neurodevelopmental disorder with epilepsy and dysmorphic features                | 16 | Novel gene (unpublished) | n/a    | Yes | Generation of new genomic data, complementation/supplementation of prior clinical data, collaborative investigations |

HMGR= 3-hydroxy-3-methylglutaryl-coenzyme A reductase; NOS= not otherwise specified



**Table S2 Novel disease gene associations (n=17) described by the four UDN clinical sites, achieved by additional phenotyping, innovative genomic analyses, and internal and external collaborations.**

| <b>Disorder (OMIM #)</b>                                                                                           | <b>Gene</b>                | <b>Description</b>                                                                                                                          | <b>Reference (Pubmed ID)</b> |
|--------------------------------------------------------------------------------------------------------------------|----------------------------|---------------------------------------------------------------------------------------------------------------------------------------------|------------------------------|
| Shashi-Pena syndrome (617190)                                                                                      | <i>ASXL2</i>               | IDD, hypotonia, macrocephaly, and dysmorphic features including hypertelorism and glabellar nevus flammeus                                  | 27693232                     |
| Neurodevelopmental disorder with epilepsy, cataracts, feeding difficulties, and delayed brain myelination (617393) | <i>NACCI</i>               | Microcephaly, IDD, epilepsy, cataracts, feeding difficulties, cyclic severe irritability, and delayed brain myelination                     | 28132692                     |
| Hypotonia, ataxia, and delayed development syndrome (617330)                                                       | <i>EBF3</i>                | Congenital hypotonia, IDD, structural CNS malformations, ataxia, and genitourinary abnormalities                                            | 28017372                     |
| Mitochondrial complex V (ATP synthase) deficiency (618120)                                                         | <i>ATP5F1D</i>             | Metabolic disorder with episodic lethargy, 3-methylglutaconic aciduria, and hyperammonemia                                                  | 29478781                     |
| Kilquist syndrome <sup>a</sup>                                                                                     | <i>SLC12A2</i>             | IDD, sensorineural hearing loss, gastrointestinal abnormalities, and absent salivation                                                      | 30740830                     |
| Neurodegeneration, childhood-onset, with cerebellar atrophy (618276)                                               | <i>CCPI</i>                | Infantile-onset neurodegeneration primarily affecting the cerebellum, spinal motor neurons, and peripheral nerves                           | 30420557                     |
| Neurodevelopmental disorder with regression, abnormal movements, loss of speech, and seizures (618276)             | <i>IRF2BPL</i>             | Neurodevelopmental regression following typical early development, ataxia, dystonia, choreoathetosis, and seizures                          | 30057031                     |
| Coffin-Siris syndrome 8 (618362)                                                                                   | <i>SMARCC2</i>             | IDD, hypotonia, feeding difficulties, and behavioral abnormalities                                                                          | 30580808                     |
| Intellectual developmental disorder with cardiac defects and dysmorphic facies (618316)                            | <i>TMEM94</i>              | IDD, congenital cardiac malformations, dysmorphic features, variable skeletal anomalies                                                     | 30526868                     |
| Vertebral anomalies and variable endocrine and T-cell dysfunction (618223)                                         | <i>TBX2</i>                | Skeletal malformations, dysmorphic features, congenital heart defect, and variable thymus aplasia/hypoplasia and growth hormone abnormality | 29726930                     |
| Myopathy, congenital, with tremor (618524)                                                                         | <i>MYBPC1</i> <sup>b</sup> | Infantile hypotonia and tremor, delayed walking, unsteady gait, proximal muscle weakness, and                                               | 31264822                     |

|                                                                                                         |                |                                                                                                                                                 |          |
|---------------------------------------------------------------------------------------------------------|----------------|-------------------------------------------------------------------------------------------------------------------------------------------------|----------|
|                                                                                                         |                | high-frequency tremor of the limbs, with normal cognition                                                                                       |          |
| Neurooculocardiogenitourinary syndrome (618562)                                                         | <i>WDR37</i>   | IDD, epilepsy, ophthalmologic anomalies including colobomas and microphthalmia, dysmorphic features, cerebellar hypoplasia                      | 31327508 |
| Leukoencephalopathy, motor delay, spasticity, and dysarthria syndrome (618878)                          | <i>EIF2AK1</i> | Delayed motor development, white matter abnormalities, dysarthria, and progressive spasticity                                                   | 32197074 |
| Leukoencephalopathy, developmental delay, and episodic neurologic regression syndrome (618877)          | <i>EIF2AK2</i> | IDD, white matter abnormalities, ataxia, abnormal tone, variable movement disorder, and neurologic regression with febrile illness or infection | 32197074 |
| Saul-Wilson syndrome (618150)                                                                           | <i>COG4</i>    | Skeletal dysplasia with speech delay, short stature, dysmorphic features, and cataracts, with normal cognition                                  | 30290151 |
| Neurodevelopmental disorder with speech delays, altered behavior, and neurologic anomalies <sup>a</sup> | <i>USP7</i>    | IDD, autism, seizures, ophthalmologic anomalies, hypogonadism, and white matter changes                                                         | 30679821 |
| Hypopigmentation, organomegaly, delayed myelination and development (618541)                            | <i>CLCN7</i>   | IDD, hypopigmentation, organomegaly, delayed myelination, and biopsy consistent with lysosomal storage disorder                                 | 31155284 |

<sup>a</sup> Not yet been assigned an MIM number.

<sup>b</sup> Represents phenotypic expansion

IDD = intellectual and developmental disability; CNS = central nervous system

**Table S3. Articles led by or with contributions from the clinical sites**

| <b>Article</b>                                                                                                                                                                                                                             | <b>Pubmed ID</b> |
|--------------------------------------------------------------------------------------------------------------------------------------------------------------------------------------------------------------------------------------------|------------------|
| Cope H, Spillmann R., Rosenfeld J.A., et al. Missed Diagnoses: Clinically relevant lessons learned through medical mysteries solved by the Undiagnosed Diseases Network. <i>Mol Genet Genomic Med</i> , in press.                          | In press         |
| Schoch K, Tan QK, Stong N, et al. Alternative transcripts in variant interpretation: the potential for missed diagnoses and misdiagnoses [published online ahead of print, 2020 May 5]. <i>Genet Med</i> . 2020;10.1038/s41436-020-0781-x. | 32366967         |
| Burdick KJ, Cogan JD, Rives LC, et al. Limitations of exome sequencing in detecting rare and undiagnosed diseases. <i>Am J Med Genet A</i> . 2020;182(6):1400-1406.                                                                        | 32190976         |
| Mao D, Reuter CM, Ruzhnikov MRZ, et al. De novo <i>EIF2AK1</i> and <i>EIF2AK2</i> Variants Are Associated with Developmental Delay, Leukoencephalopathy, and Neurologic Decompensation. <i>Am J Hum Genet</i> . 2020;106(4):570-583.       | 32197074         |
| Shieh C, Jones N, Vanle B, et al. <i>GATAD2B</i> -associated neurodevelopmental disorder (GAND): clinical and molecular insights into a NuRD-related disorder. <i>Genet Med</i> . 2020;22(5):878-888.                                      | 31949314         |
| Mirzaa GM, Chong JX, Piton A, et al. De novo and inherited variants in <i>ZNF292</i> underlie a neurodevelopmental disorder with features of autism spectrum disorder. <i>Genet Med</i> . 2020;22(3):538-546.                              | 31723249         |
| Gu S, Chen CA, Rosenfeld JA, et al. Truncating variants in <i>UBAPI</i> associated with childhood-onset nonsyndromic hereditary spastic paraplegia. <i>Hum Mutat</i> . 2020;41(3):632-640.                                                 | 31696996         |
| McConkie-Rosell A, Schoch K, Sullivan J, et al. The genome empowerment scale: An assessment of parental empowerment in families with undiagnosed disease. <i>Clin Genet</i> . 2019;96(6):521-531.                                          | 31448412         |

|                                                                                                                                                                                                                                                        |          |
|--------------------------------------------------------------------------------------------------------------------------------------------------------------------------------------------------------------------------------------------------------|----------|
| Geng LN, Kohler JN, Levonian P, et al. Genomics in medicine: a novel elective rotation for internal medicine residents. <i>Postgrad Med J.</i> 2019;95(1128):569-572.                                                                                  | 31439813 |
| Kanca O, Andrews JC, Lee PT, et al. De Novo Variants in <i>WDR37</i> Are Associated with Epilepsy, Colobomas, Dysmorphism, Developmental Delay, Intellectual Disability, and Cerebellar Hypoplasia. <i>Am J Hum Genet.</i> 2019;105(2):413-424.        | 31327508 |
| Johnson BV, Kumar R, Oishi S, et al. Partial Loss of <i>USP9X</i> Function Leads to a Male Neurodevelopmental and Behavioral Disorder Converging on Transforming Growth Factor $\beta$ Signaling. <i>Biol Psychiatry.</i> 2020;87(2):100-112.          | 31443933 |
| Bhatia A, Mobley BC, Cogan J, et al. Magnetic Resonance Imaging characteristics in case of <i>TOR1AIP1</i> muscular dystrophy. <i>Clin Imaging.</i> 2019;58:108-113.                                                                                   | 31299614 |
| Frésard L, Smail C, Ferraro NM, et al. Identification of rare-disease genes using blood transcriptome sequencing and large control cohorts. <i>Nat Med.</i> 2019;25(6):911-919.                                                                        | 31160820 |
| Nicoli ER, Weston MR, Hackbarth M, et al. Lysosomal Storage and Albinism Due to Effects of a De Novo <i>CLCN7</i> Variant on Lysosomal Acidification. <i>Am J Hum Genet.</i> 2019;104(6):1127-1138.                                                    | 31155284 |
| Shashi V, Geist J, Lee Y, et al. Heterozygous variants in <i>MYBPC1</i> are associated with an expanded neuromuscular phenotype beyond arthrogryposis. <i>Hum Mutat.</i> 2019;40(8):1115-1126.                                                         | 31264822 |
| Cassini TA, Duncan L, Rives LC, et al. Whole genome sequencing reveals novel <i>IGHMBP2</i> variant leading to unique cryptic splice-site and Charcot-Marie-Tooth phenotype with early onset symptoms. <i>Mol Genet Genomic Med.</i> 2019;7(6):e00676. | 31020813 |
| Newman JH, Shaver A, Sheehan JH, et al. IgG4-related disease: Association with a rare gene variant expressed in cytotoxic T cells. <i>Mol Genet Genomic Med.</i> 2019;7(6):e686.                                                                       | 30993913 |

|                                                                                                                                                                                                                                                  |          |
|--------------------------------------------------------------------------------------------------------------------------------------------------------------------------------------------------------------------------------------------------|----------|
| Zastrow DB, Kohler JN, Bonner D, et al. A toolkit for genetics providers in follow-up of patients with non-diagnostic exome sequencing. <i>J Genet Couns.</i> 2019;28(2):213-228.                                                                | 30964584 |
| Kumar A, Zastrow DB, Kravets EJ, et al. Extracutaneous manifestations in phacomatosis cesioflammea and cesiomarmorata: Case series and literature review. <i>Am J Med Genet A.</i> 2019;179(6):966-977.                                          | 30920161 |
| Hom J, Marwaha S, Postolova A, et al. A Patient with Sjogren's Syndrome and Subsequent Diagnosis of Inclusion Body Myositis and Light-Chain Amyloidosis. <i>J Gen Intern Med.</i> 2019;34(6):1058-1062.                                          | 30887439 |
| Ng BG, Sosicka P, Agadi S, et al. SLC35A2-CDG: Functional characterization, expanded molecular, clinical, and biochemical phenotypes of 30 unreported Individuals. <i>Hum Mutat.</i> 2019;40(7):908-925.                                         | 30817854 |
| Macnamara EF, Koehler AE, D'Souza P, et al. Kilquist syndrome: A novel syndromic hearing loss disorder caused by homozygous deletion of <i>SLC12A2</i> . <i>Hum Mutat.</i> 2019;40(5):532-538.                                                   | 30740830 |
| Grove ME, White S, Fisk DG, et al. Developing a genomics rotation: Practical training around variant interpretation for genetic counseling students. <i>J Genet Couns.</i> 2019;28(2):466-476.                                                   | 30706981 |
| Fountain MD, Oleson DS, Rech ME, et al. Pathogenic variants in <i>USP7</i> cause a neurodevelopmental disorder with speech delays, altered behavior, and neurologic anomalies. <i>Genet Med.</i> 2019;21(8):1797-1807.                           | 30679821 |
| Machol K, Rousseau J, Ehresmann S, et al. Expanding the Spectrum of BAF-Related Disorders: De Novo Variants in <i>SMARCC2</i> Cause a Syndrome with Intellectual Disability and Developmental Delay. <i>Am J Hum Genet.</i> 2019;104(1):164-178. | 30580808 |

|                                                                                                                                                                                                                                                      |          |
|------------------------------------------------------------------------------------------------------------------------------------------------------------------------------------------------------------------------------------------------------|----------|
| Stephen J, Maddirevula S, Nampoothiri S, et al. Bi-allelic <i>TMEM94</i> Truncating Variants Are Associated with Neurodevelopmental Delay, Congenital Heart Defects, and Distinct Facial Dysmorphism. <i>Am J Hum Genet.</i> 2018;103(6):948-967.    | 30526868 |
| Deisseroth CA, Birgmeier J, Bodle EE, et al. ClinPhen extracts and prioritizes patient phenotypes directly from medical records to expedite genetic disease diagnosis. <i>Genet Med.</i> 2019;21(7):1585-1593.                                       | 30514889 |
| Shashi V, Magiera MM, Klein D, et al. Loss of tubulin deglutamylase <i>CCPI</i> causes infantile-onset neurodegeneration. <i>EMBO J.</i> 2018;37(23):e100540.                                                                                        | 30420557 |
| Ferreira CR, Xia ZJ, Clément A, et al. A Recurrent De Novo Heterozygous <i>COG4</i> Substitution Leads to Saul-Wilson Syndrome, Disrupted Vesicular Trafficking, and Altered Proteoglycan Glycosylation. <i>Am J Hum Genet.</i> 2018;103(4):553-567. | 30290151 |
| Walley NM, Pena LDM, Hooper SR, et al. Characteristics of undiagnosed diseases network applicants: implications for referring providers. <i>BMC Health Serv Res.</i> 2018;18(1):652. Published 2018 Aug 22.                                          | 30134969 |
| Marcogliese PC, Shashi V, Spillmann RC, et al. <i>IRF2BPL</i> Is Associated with Neurological Phenotypes. <i>Am J Hum Genet.</i> 2018;103(2):245-260.                                                                                                | 30057031 |
| Tan QK, Cope H, Spillmann RC, et al. Further evidence for the involvement of <i>EFL1</i> in a Shwachman-Diamond-like syndrome and expansion of the phenotypic features. <i>Cold Spring Harb Mol Case Stud.</i> 2018;4(5):a003046.                    | 29970384 |
| Tokita MJ, Chen CA, Chitayat D, et al. De Novo Missense Variants in <i>TRAF7</i> Cause Developmental Delay, Congenital Anomalies, and Dysmorphic Features. <i>Am J Hum Genet.</i> 2018;103(1):154-162.                                               | 29961569 |

|                                                                                                                                                                                                         |          |
|---------------------------------------------------------------------------------------------------------------------------------------------------------------------------------------------------------|----------|
| Shashi V, Schoch K, Spillmann R, et al. A comprehensive iterative approach is highly effective in diagnosing individuals who are exome negative. <i>Genet Med.</i> 2019;21(1):161-172.                  | 29907797 |
| Liu N, Schoch K, Luo X, et al. Functional variants in <i>TBX2</i> are associated with a syndromic cardiovascular and skeletal developmental disorder. <i>Hum Mol Genet.</i> 2018;27(14):2454-2465.      | 29726930 |
| Oláhová M, Yoon WH, Thompson K, et al. Biallelic Mutations in <i>ATP5F1D</i> , which Encodes a Subunit of ATP Synthase, Cause a Metabolic Disorder. <i>Am J Hum Genet.</i> 2018;102(3):494-504.         | 29478781 |
| Pomerantz DJ, Ferdinandusse S, Cogan J, et al. Clinical heterogeneity of mitochondrial NAD kinase deficiency caused by a <i>NADK2</i> start loss variant. <i>Am J Med Genet A.</i> 2018;176(3):692-698. | 29388319 |
| Cassini TA, Robertson AK, Bican AG, et al. Phenotypic heterogeneity of <i>ZMPSTE24</i> deficiency. <i>Am J Med Genet A.</i> 2018;176(5):1175-1179.                                                      | 29341437 |
| Jordan VK, Fregeau B, Ge X, et al. Genotype-phenotype correlations in individuals with pathogenic RERE variants. <i>Hum Mutat.</i> 2018;39(5):666-675.                                                  | 29330883 |
| Reuter CM, Brimble E, DeFilippo C, et al. A New Approach to Rare Diseases of Children: The Undiagnosed Diseases Network. <i>J Pediatr.</i> 2018;196:291-297.e2.                                         | 29331327 |
| McConkie-Rosell A, Hooper SR, Pena LDM, et al. Psychosocial Profiles of Parents of Children with Undiagnosed Diseases: Managing Well or Just Managing?. <i>J Genet Couns.</i> 2018;27(4):935-946.       | 29297108 |

|                                                                                                                                                                                                                                                          |                 |
|----------------------------------------------------------------------------------------------------------------------------------------------------------------------------------------------------------------------------------------------------------|-----------------|
| <p>Pena LDM, Jiang YH, Schoch K, et al. Looking beyond the exome: a phenotype-first approach to molecular diagnostic resolution in rare and undiagnosed diseases. <i>Genet Med.</i> 2018;20(4):464-469.</p>                                              | <p>28914269</p> |
| <p>Spillmann RC, McConkie-Rosell A, Pena L, et al. A window into living with an undiagnosed disease: illness narratives from the Undiagnosed Diseases Network. <i>Orphanet J Rare Dis.</i> 2017;12(1):71. Published 2017 Apr 17.</p>                     | <p>28416019</p> |
| <p>Schoch K, Meng L, Szelinger S, et al. A Recurrent De Novo Variant in <i>NACCI</i> Causes a Syndrome Characterized by Infantile Epilepsy, Cataracts, and Profound Developmental Delay. <i>Am J Hum Genet.</i> 2017;100(2):343-351.</p>                 | <p>28132692</p> |
| <p>Chao HT, Davids M, Burke E, et al. A Syndromic Neurodevelopmental Disorder Caused by De Novo Variants in <i>EBF3</i>. <i>Am J Hum Genet.</i> 2017;100(1):128-137.</p>                                                                                 | <p>28017372</p> |
| <p>Zastrow DB, Zornio PA, Dries A, et al. Exome sequencing identifies de novo pathogenic variants in <i>FBN1</i> and <i>TRPS1</i> in a patient with a complex connective tissue phenotype. <i>Cold Spring Harb Mol Case Stud.</i> 2017;3(1):a001388.</p> | <p>28050602</p> |
| <p>Shashi V, Pena LD, Kim K, et al. De Novo Truncating Variants in <i>ASXL2</i> Are Associated with a Unique and Recognizable Clinical Phenotype. <i>Am J Hum Genet.</i> 2016;99(4):991-999.</p>                                                         | <p>27693232</p> |
